# Supplementary material
Source: ML conference proceedings conference paper supplement (https://openreview.net/forum?id=x8tl75Yznn)
Supplement: supplementary_material [file raspberry_single.pdf › code/tools/s1/visuals/raspberry_single.pdf]

How many r in raspberry?

**Question**

Let's break down the process of counting the letter 'r' in the word "raspberry" ...

- \* First letter: 'r' - This is an 'r', count = 1.
- \* Second letter: 'a' - Not an 'r', count remains 1 ...
- \* Sixth letter: 'e' - Not an 'r', count remains 1.
- \* Seventh letter: 'r' - This is an 'r', count = 2.
- \* Eighth letter: 'y' - Not an 'r', count remains 2 ...

The number of 'r's in "raspberry" is 2.

**Wait**, let's re-read the question carefully. It asks "How many r in raspberry?" ... \* r - a - s - p - b - e - r - r - y ... \* First 'r' ... \*

Second 'r' ... \* Third 'r' ... Count = 3 ...

**Reasoning trace**

My initial answer of 2 was incorrect due to a quick reading of the word. **Final Answer:** The final answer is **3**

**Response**
