# Supplementary material
Source: ML conference proceedings conference paper supplement (https://openreview.net/forum?id=x8tl75Yznn)

Mathematical Problem Solving  
(MATH500)

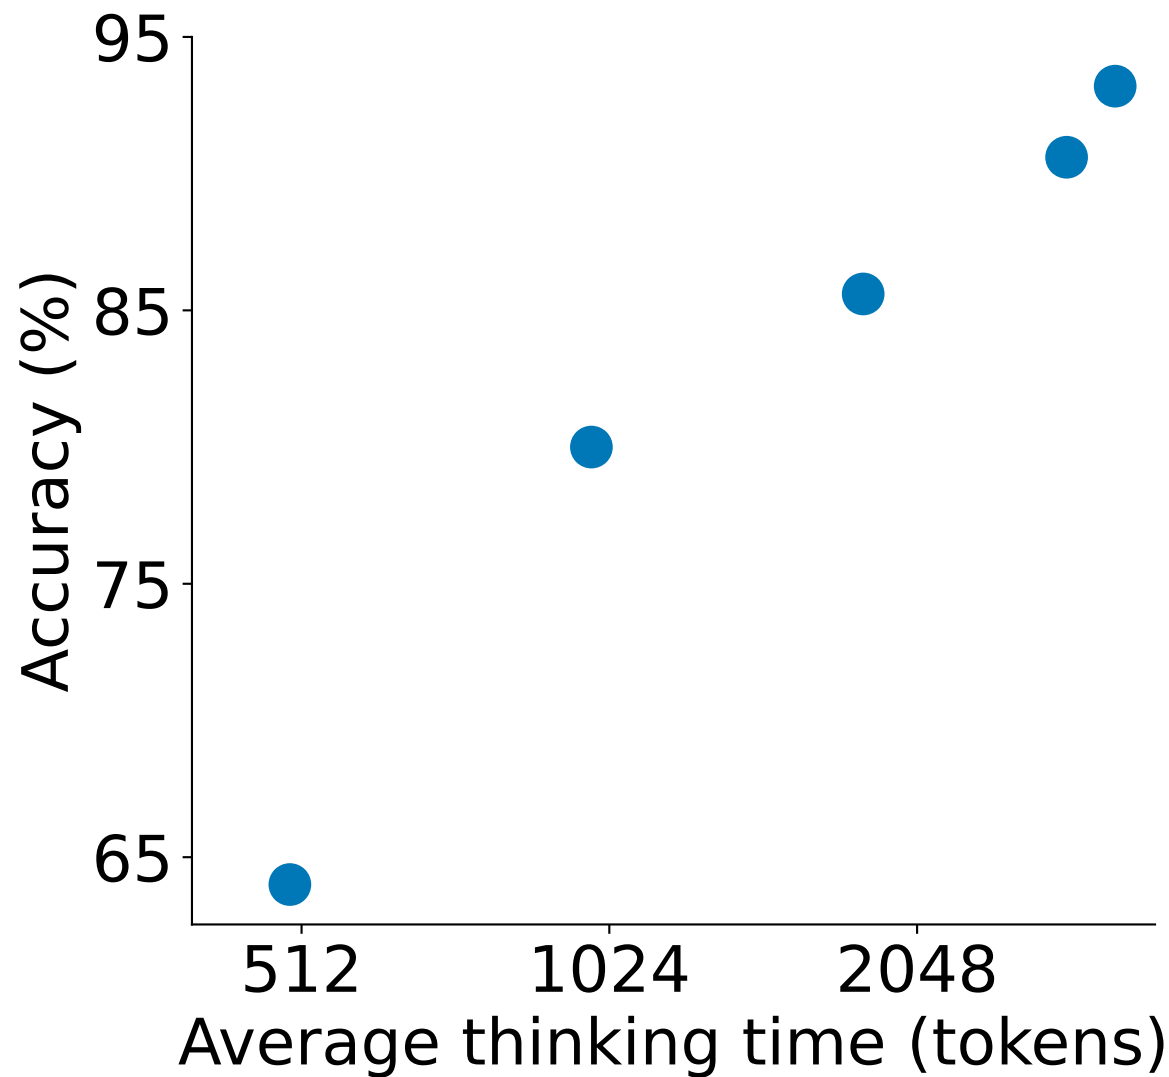

Competition Math  
(AIME24)

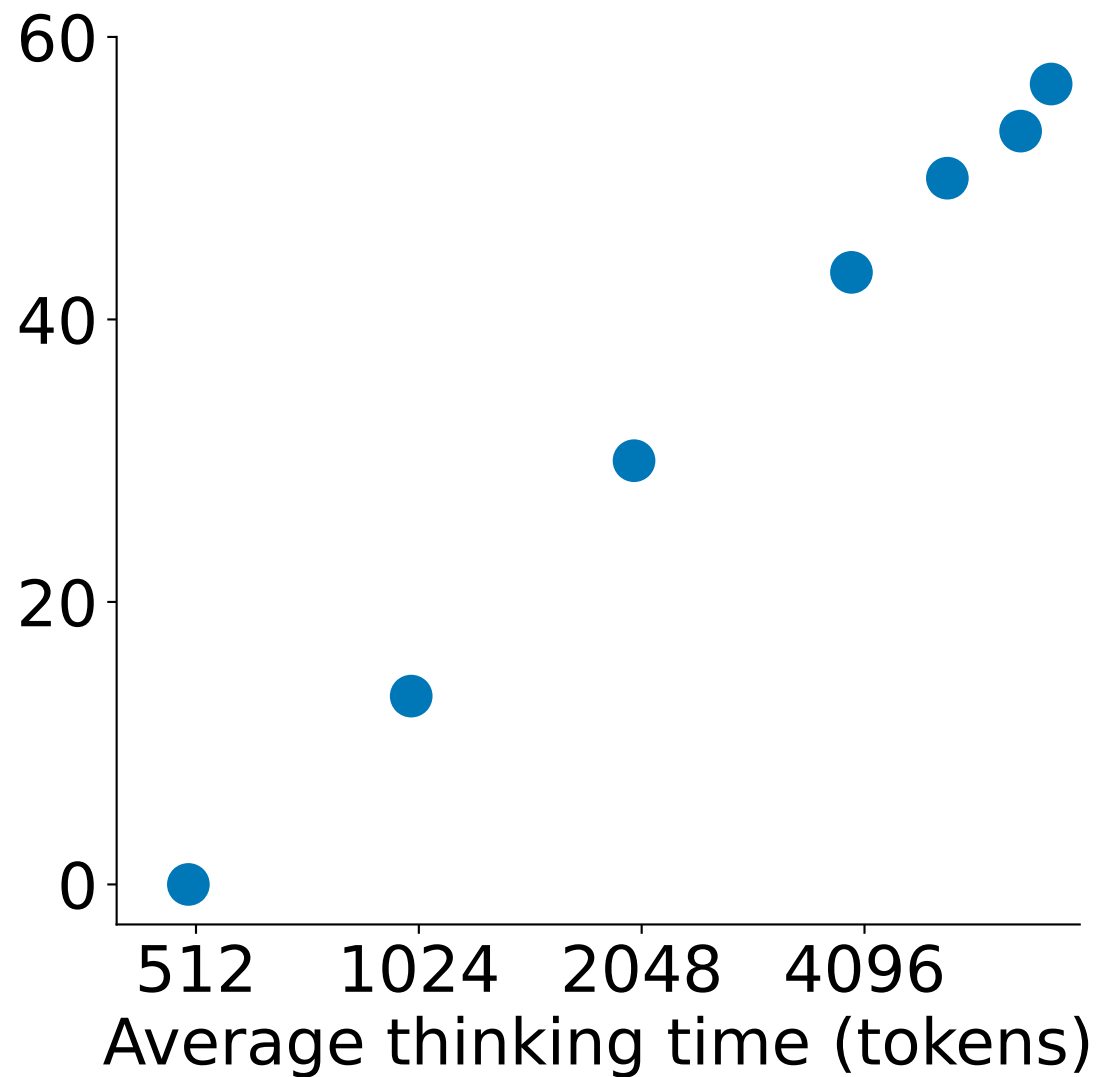

PhD-Level Science Questions  
(GPQA Diamond)

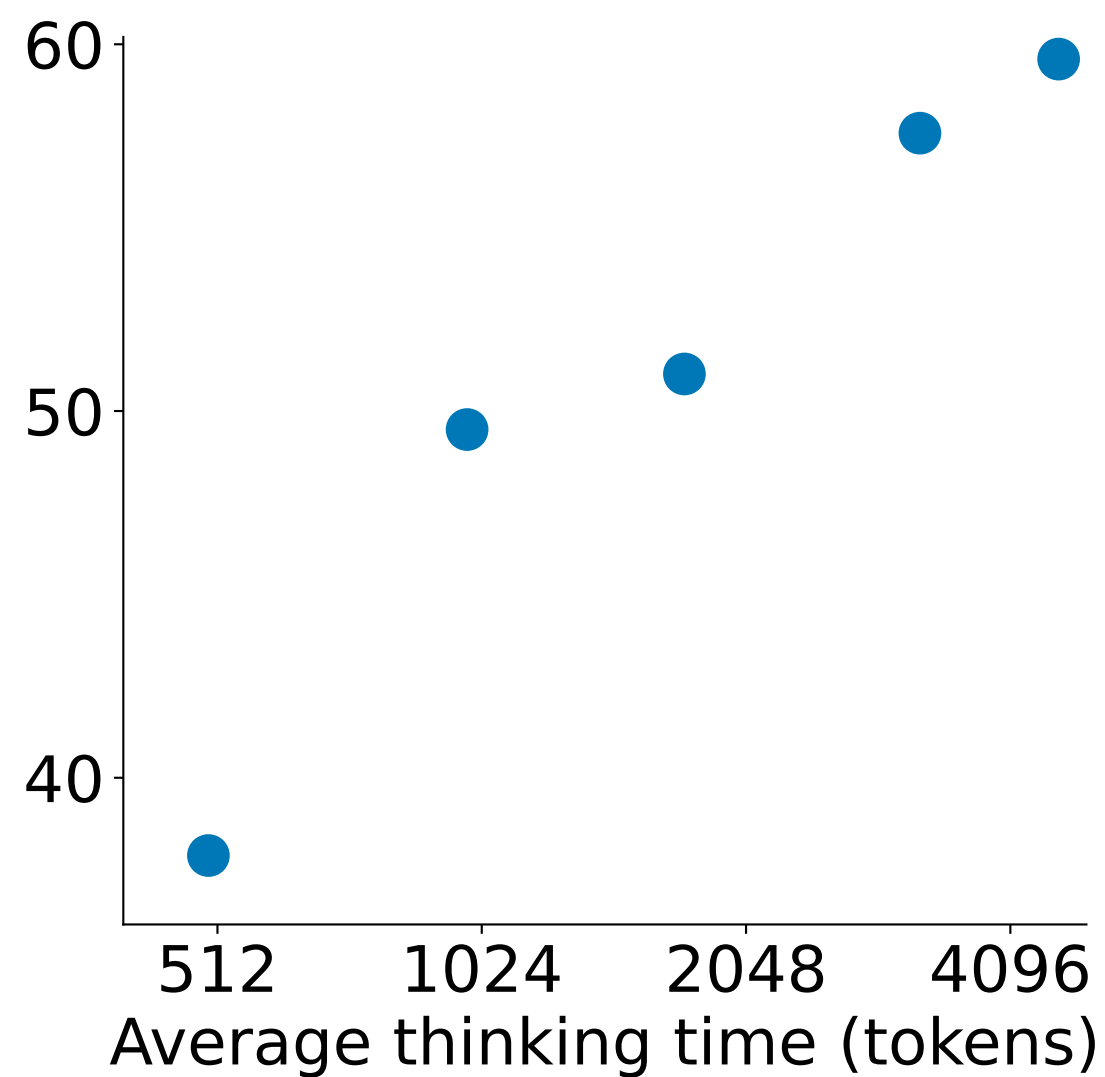

Supplement: supplementary_material [file scaling.pdf › code/tools/s1/visuals/scaling.pdf]
