# Supplementary material
Source: ML conference proceedings conference paper supplement (https://openreview.net/forum?id=x8tl75Yznn)

Mathematical  
Problem Solving  
(MATH500)

Competition  
Math  
(AIME24)

PhD-Level  
Science Questions  
(GPQA Diamond)

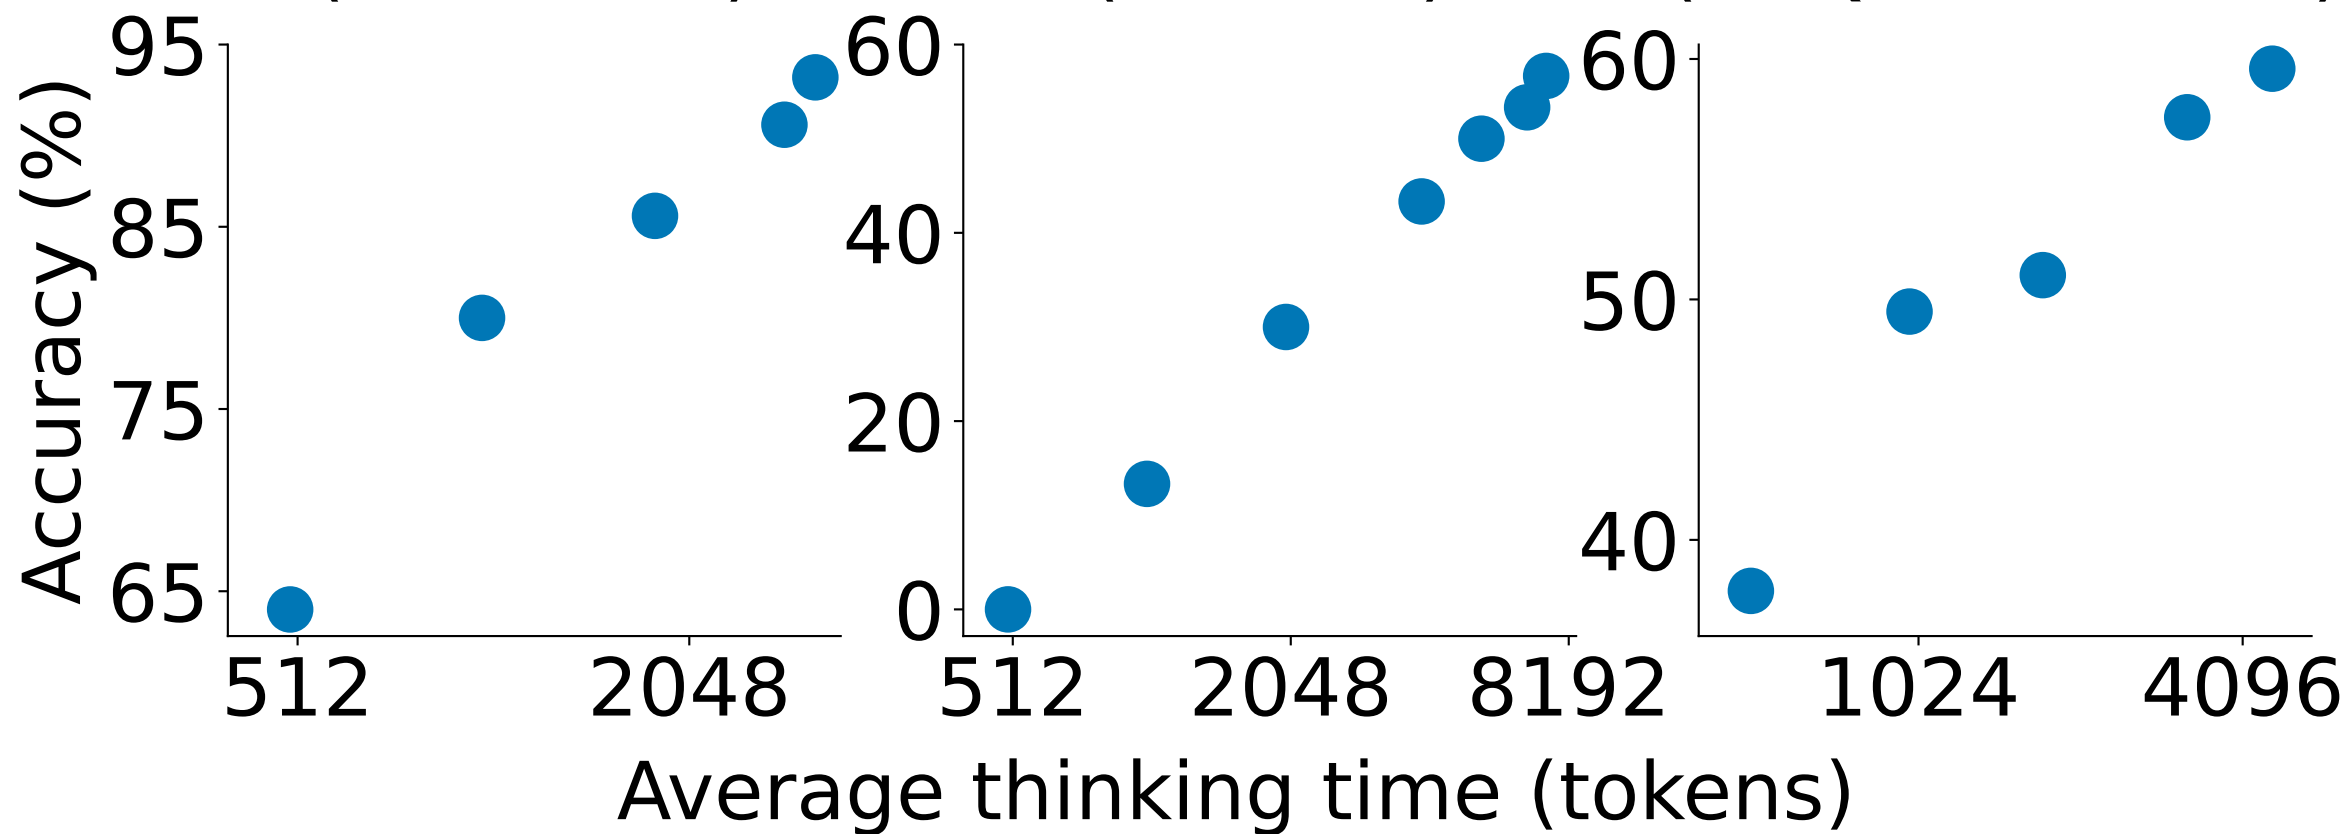

Supplement: supplementary_material [file scaling_compressed.pdf › code/tools/s1/visuals/scaling_compressed.pdf]
