# Supplementary material
Source: ML conference proceedings conference paper supplement (https://openreview.net/forum?id=x8tl75Yznn)

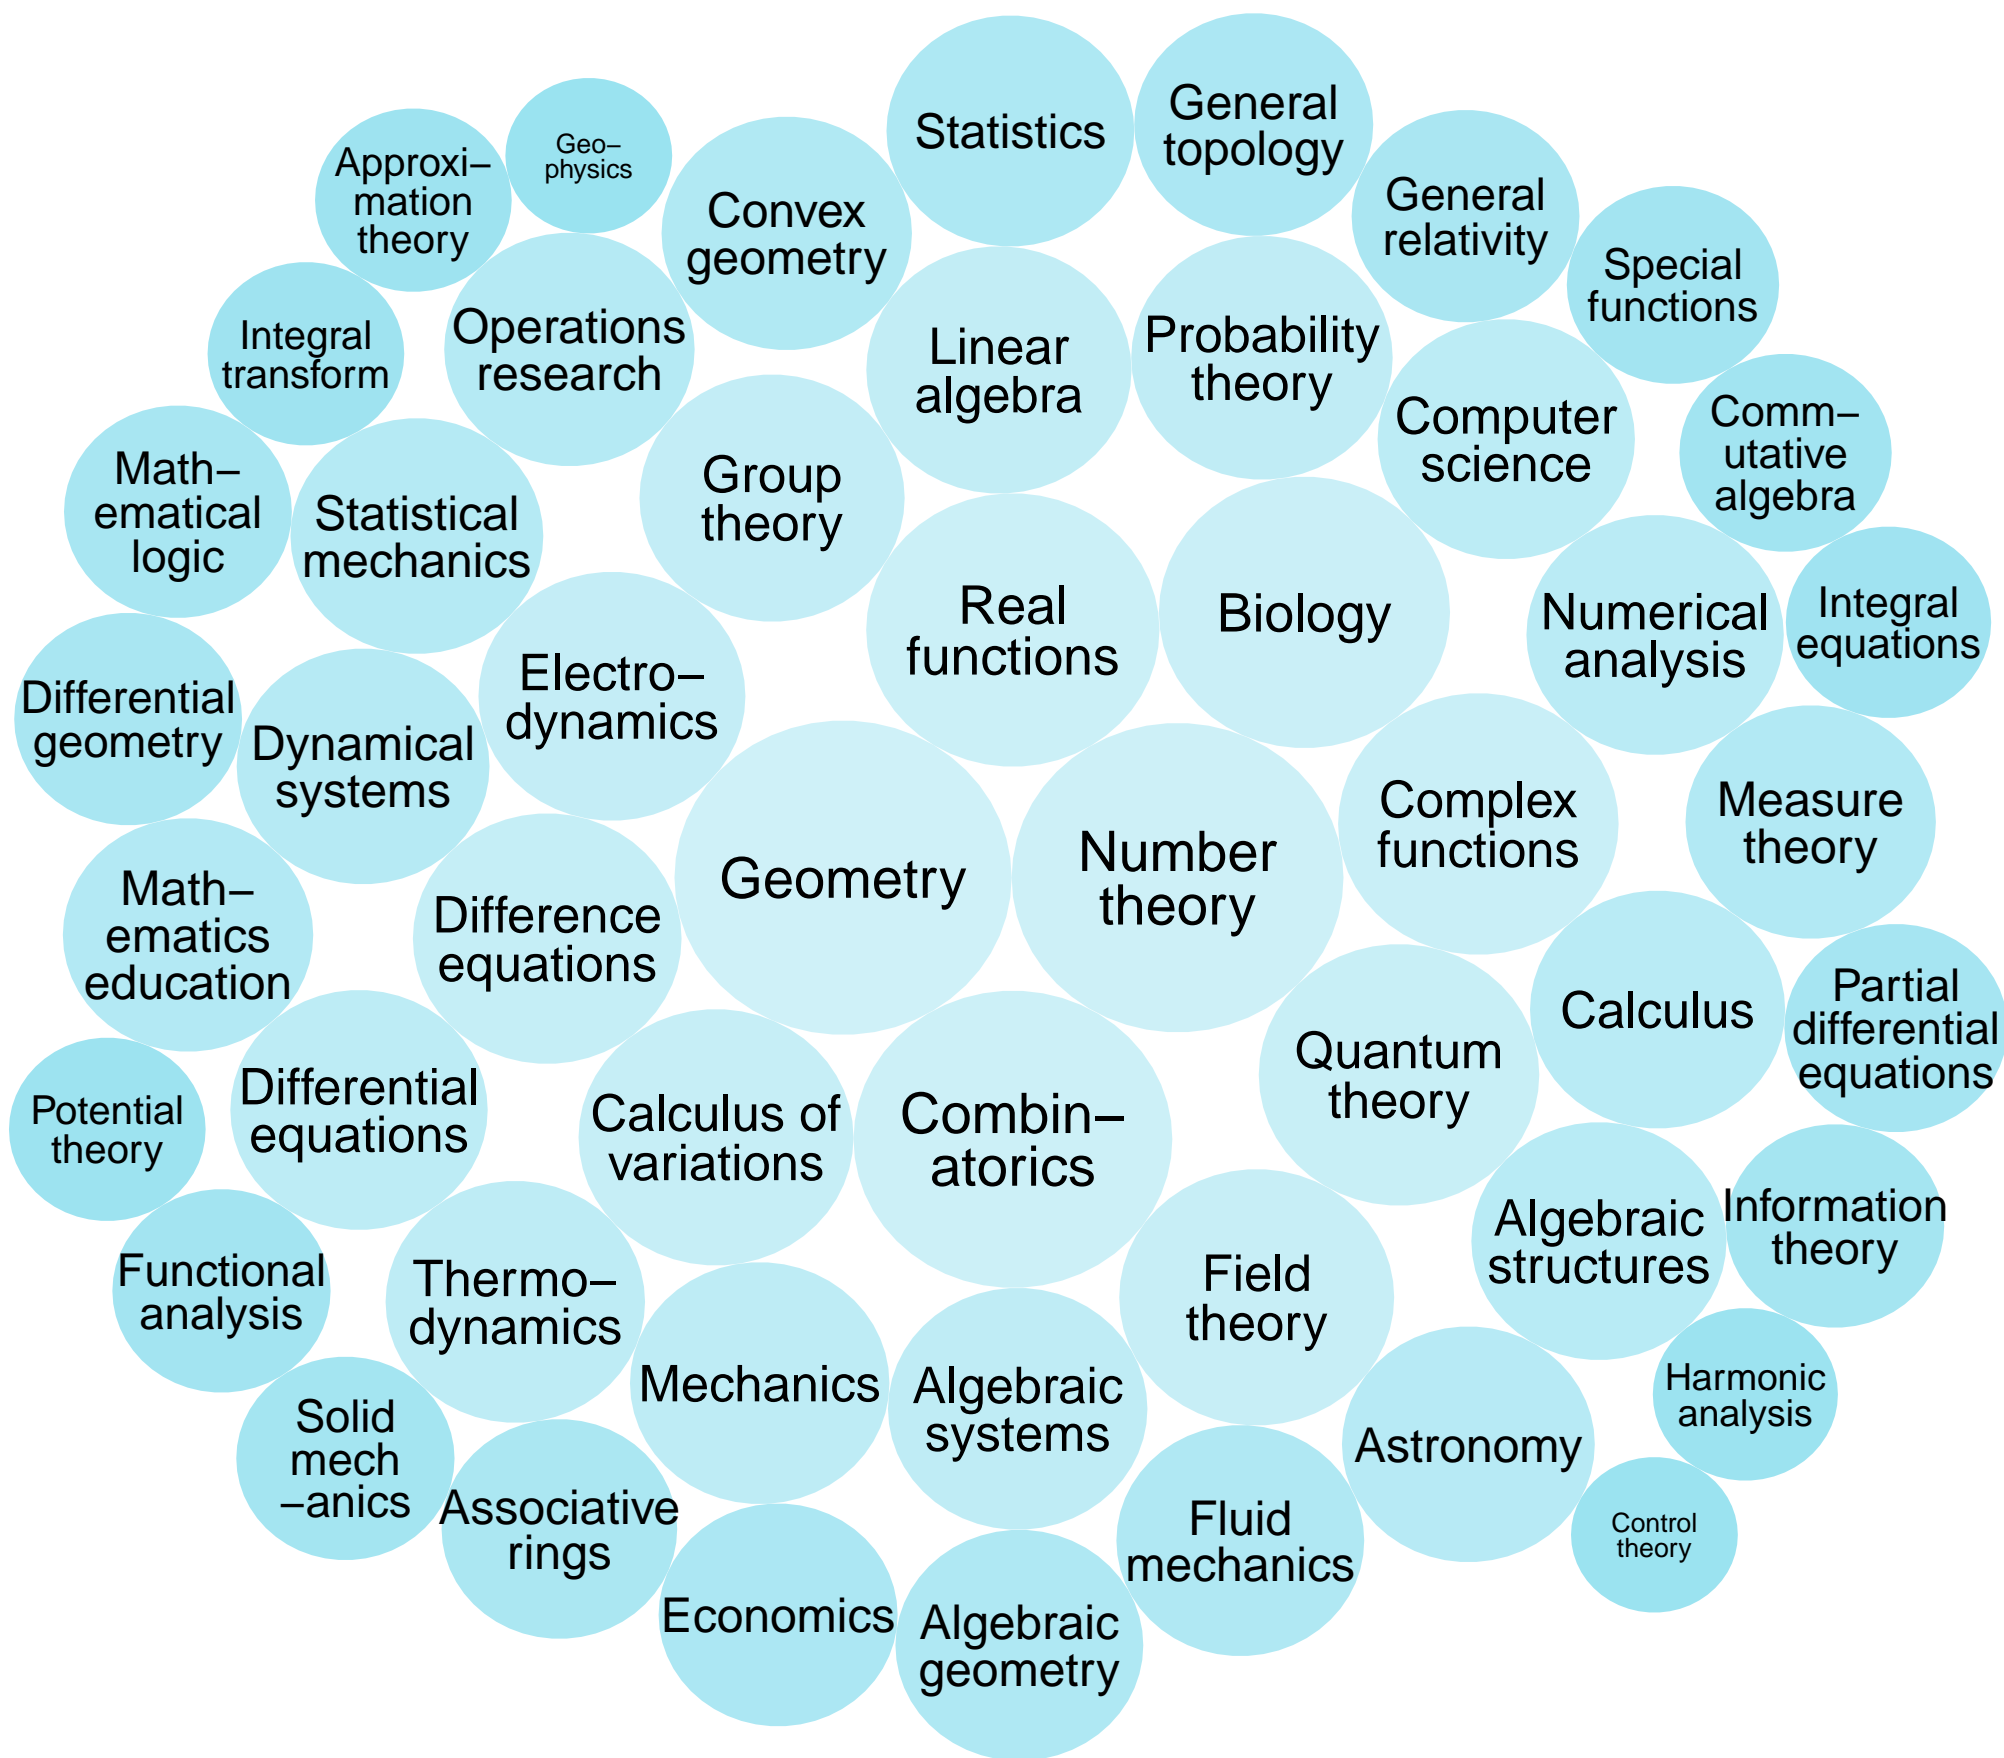

Supplement: supplementary_material [file bubble.pdf › code/tools/s1/visuals/bubble.pdf]

# Competition Math (AIME24)

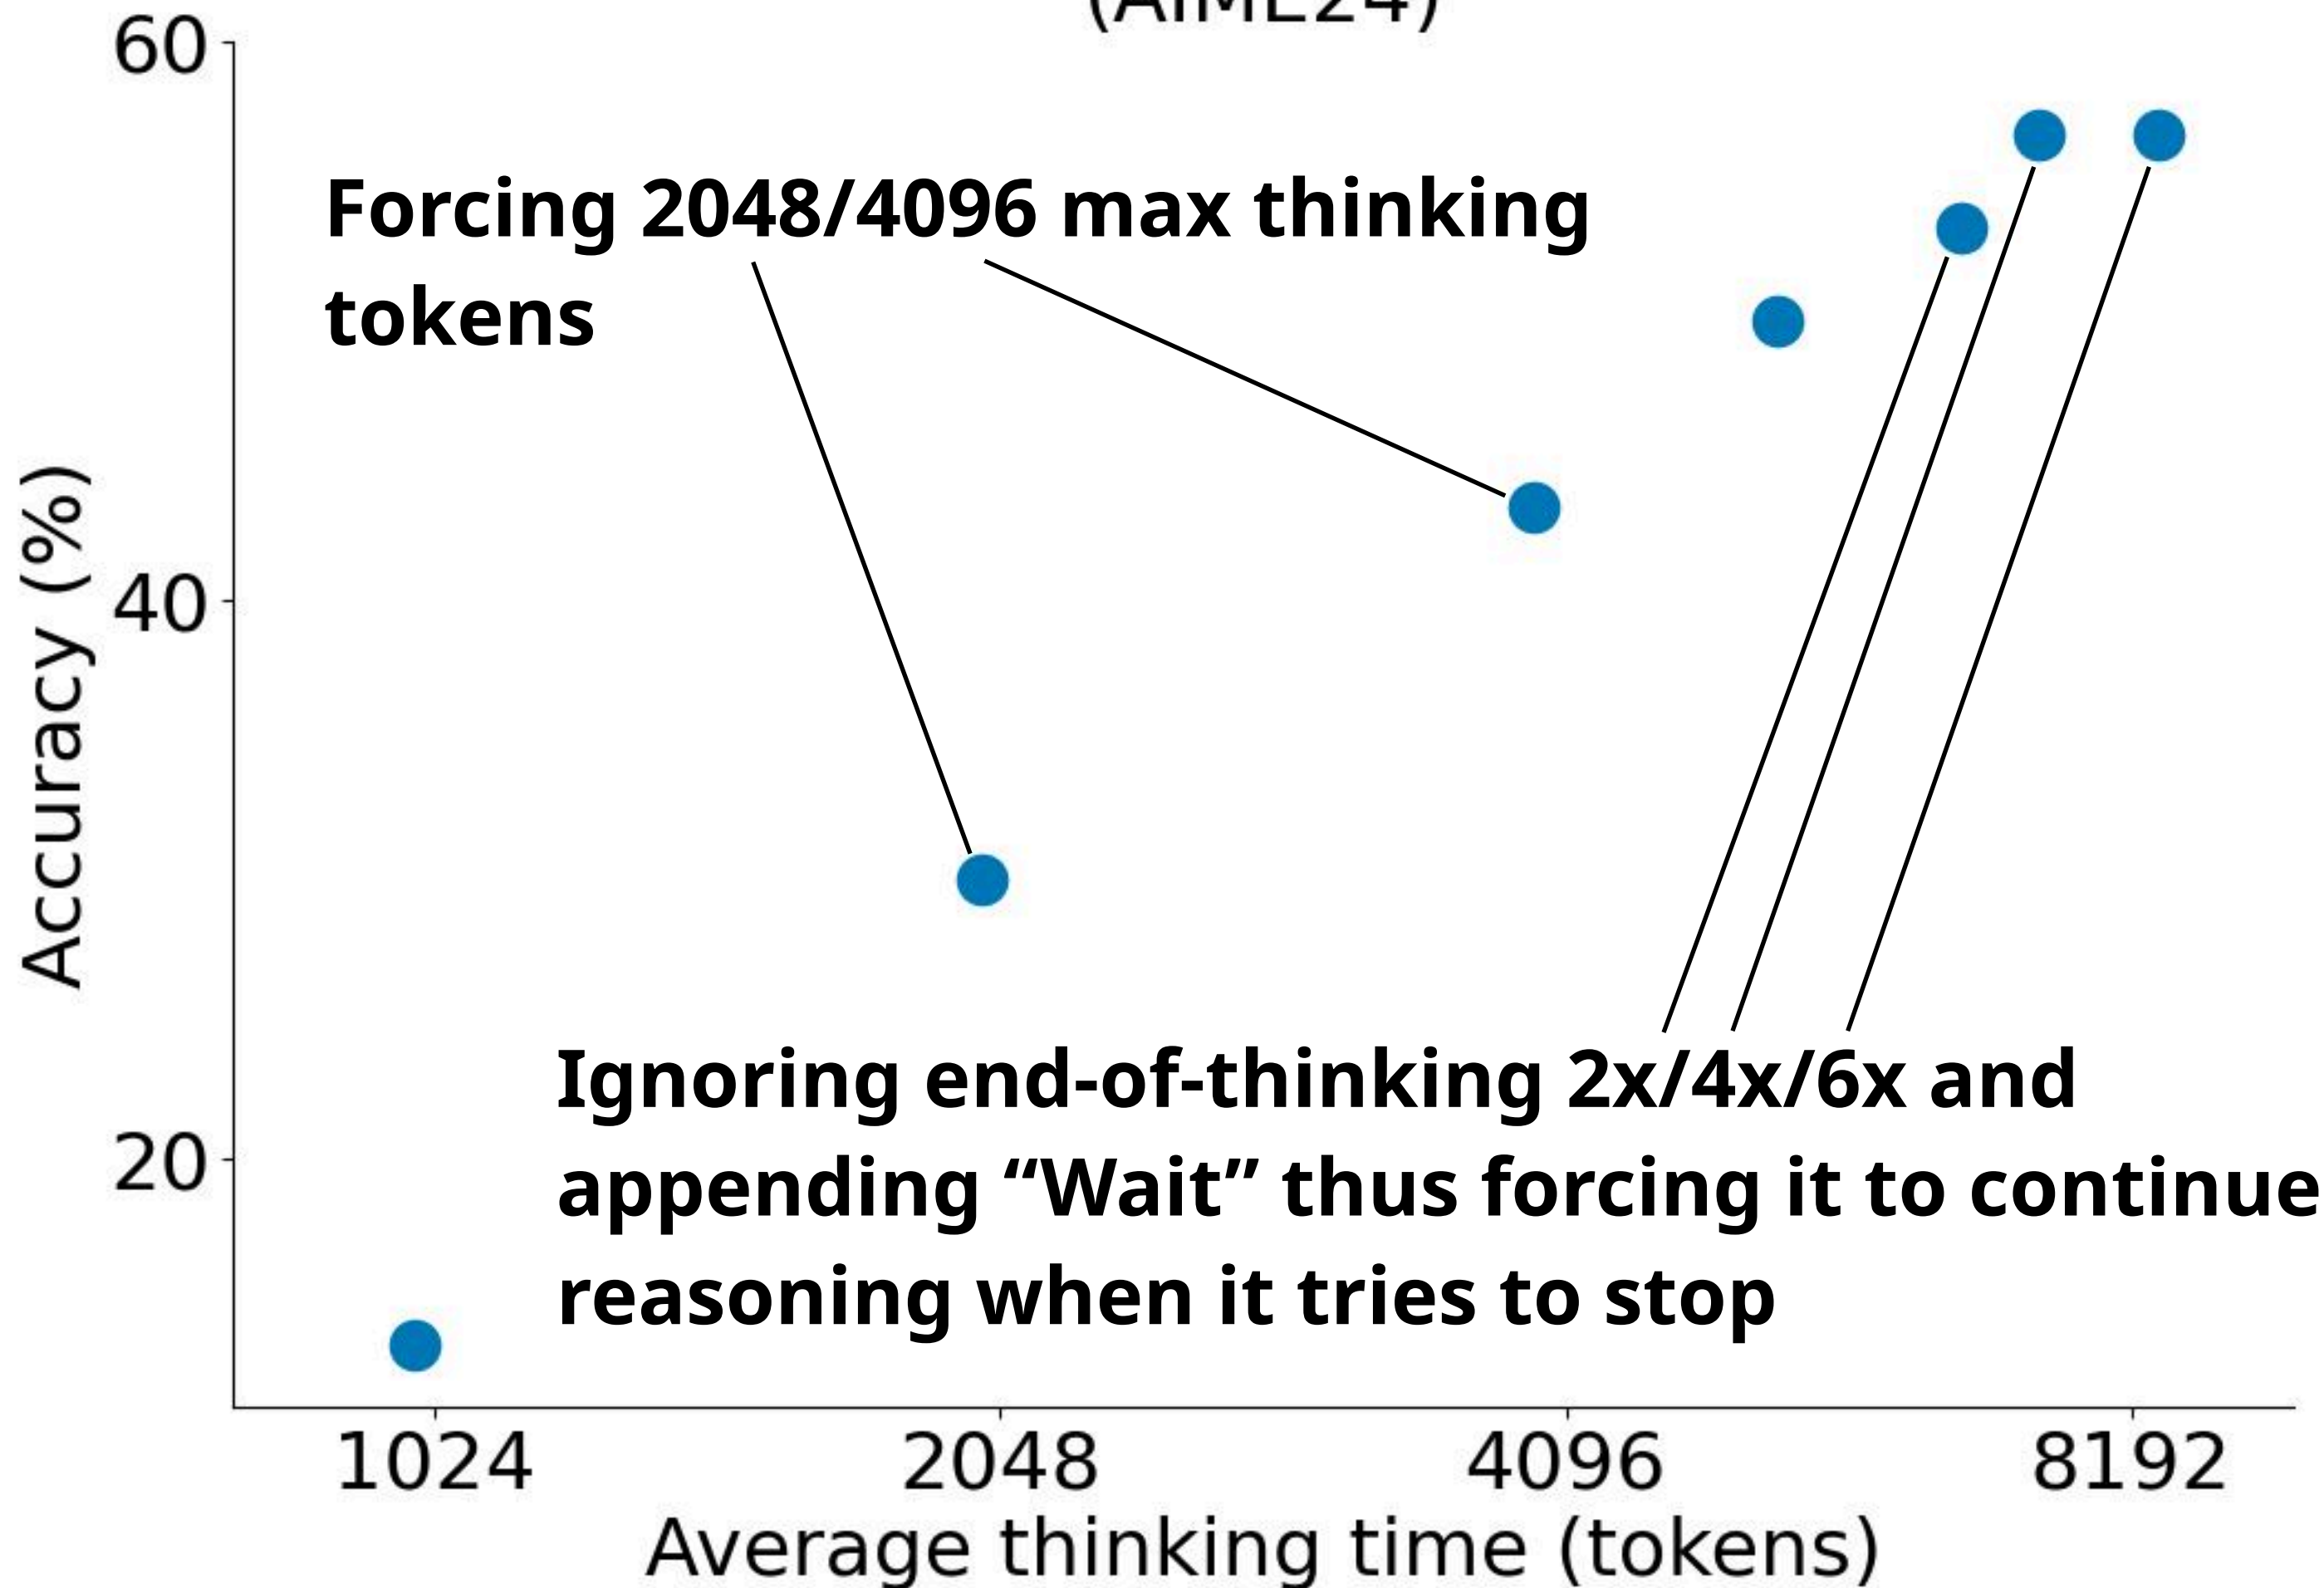

Supplement: supplementary_material [file budget_forcing.pdf › code/tools/s1/visuals/budget_forcing.pdf]

# PhD-Level Science Questions (GPQA Diamond)

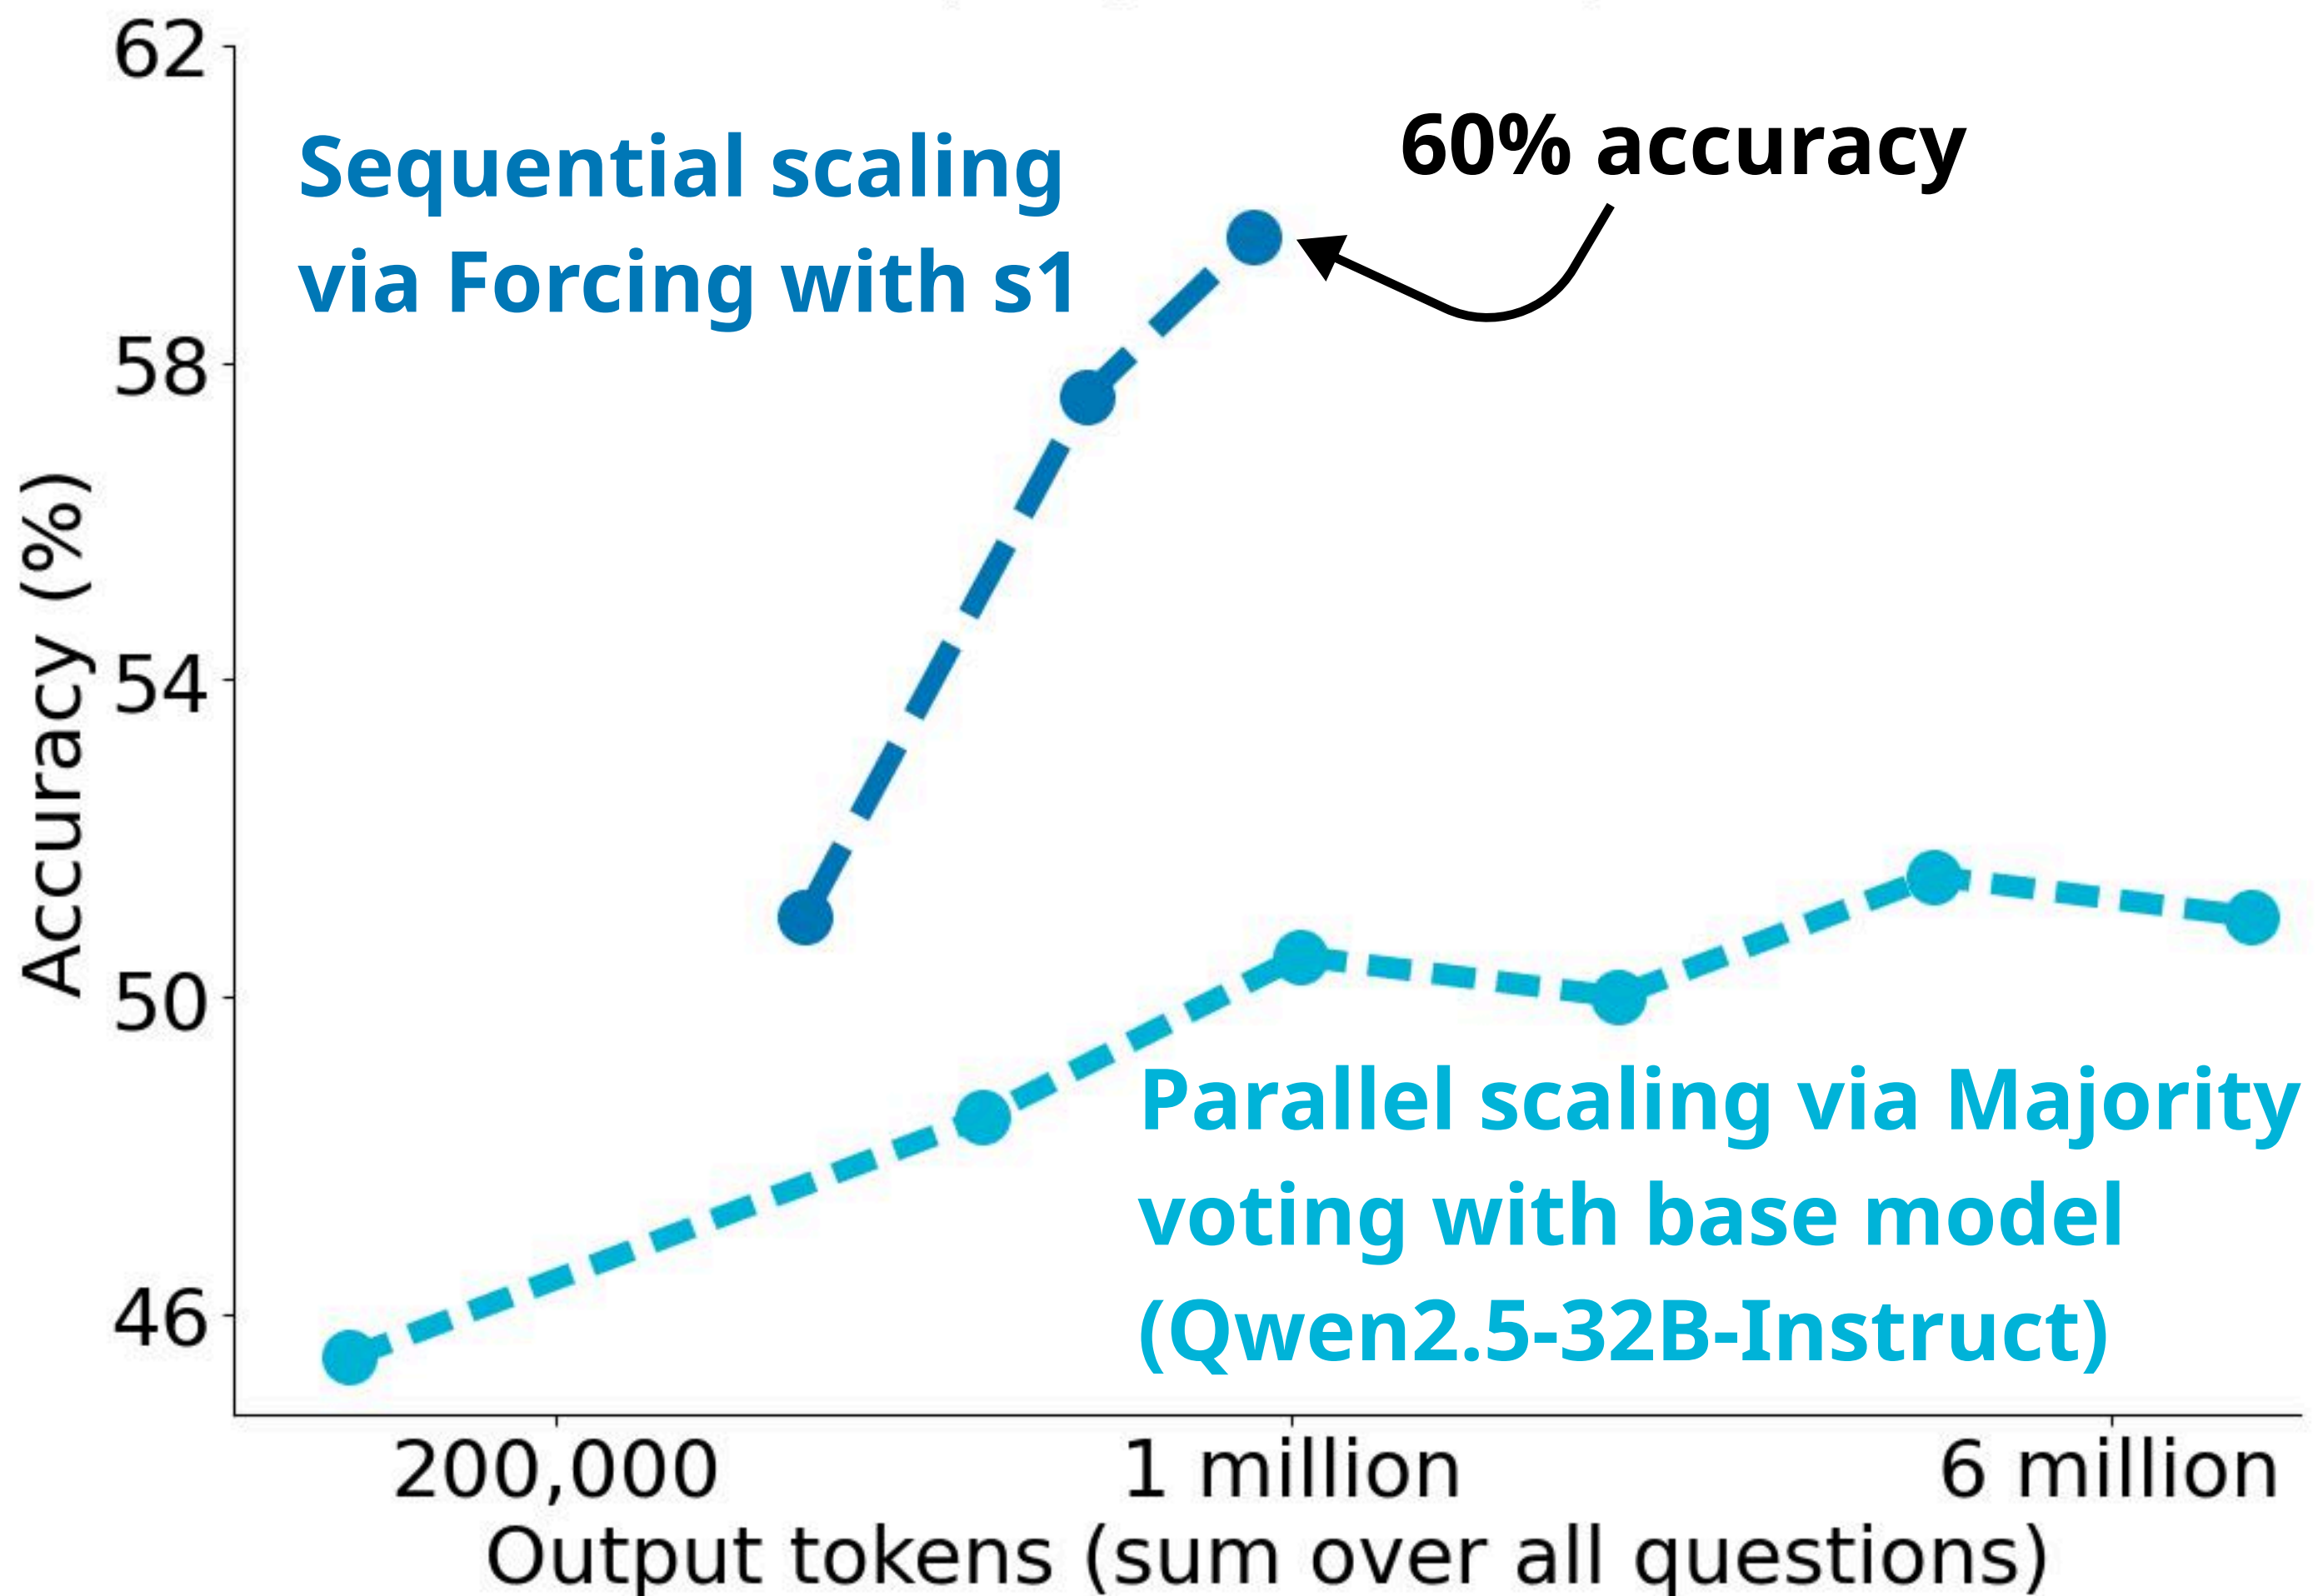

Supplement: supplementary_material [file majority.pdf › code/tools/s1/visuals/majority.pdf]

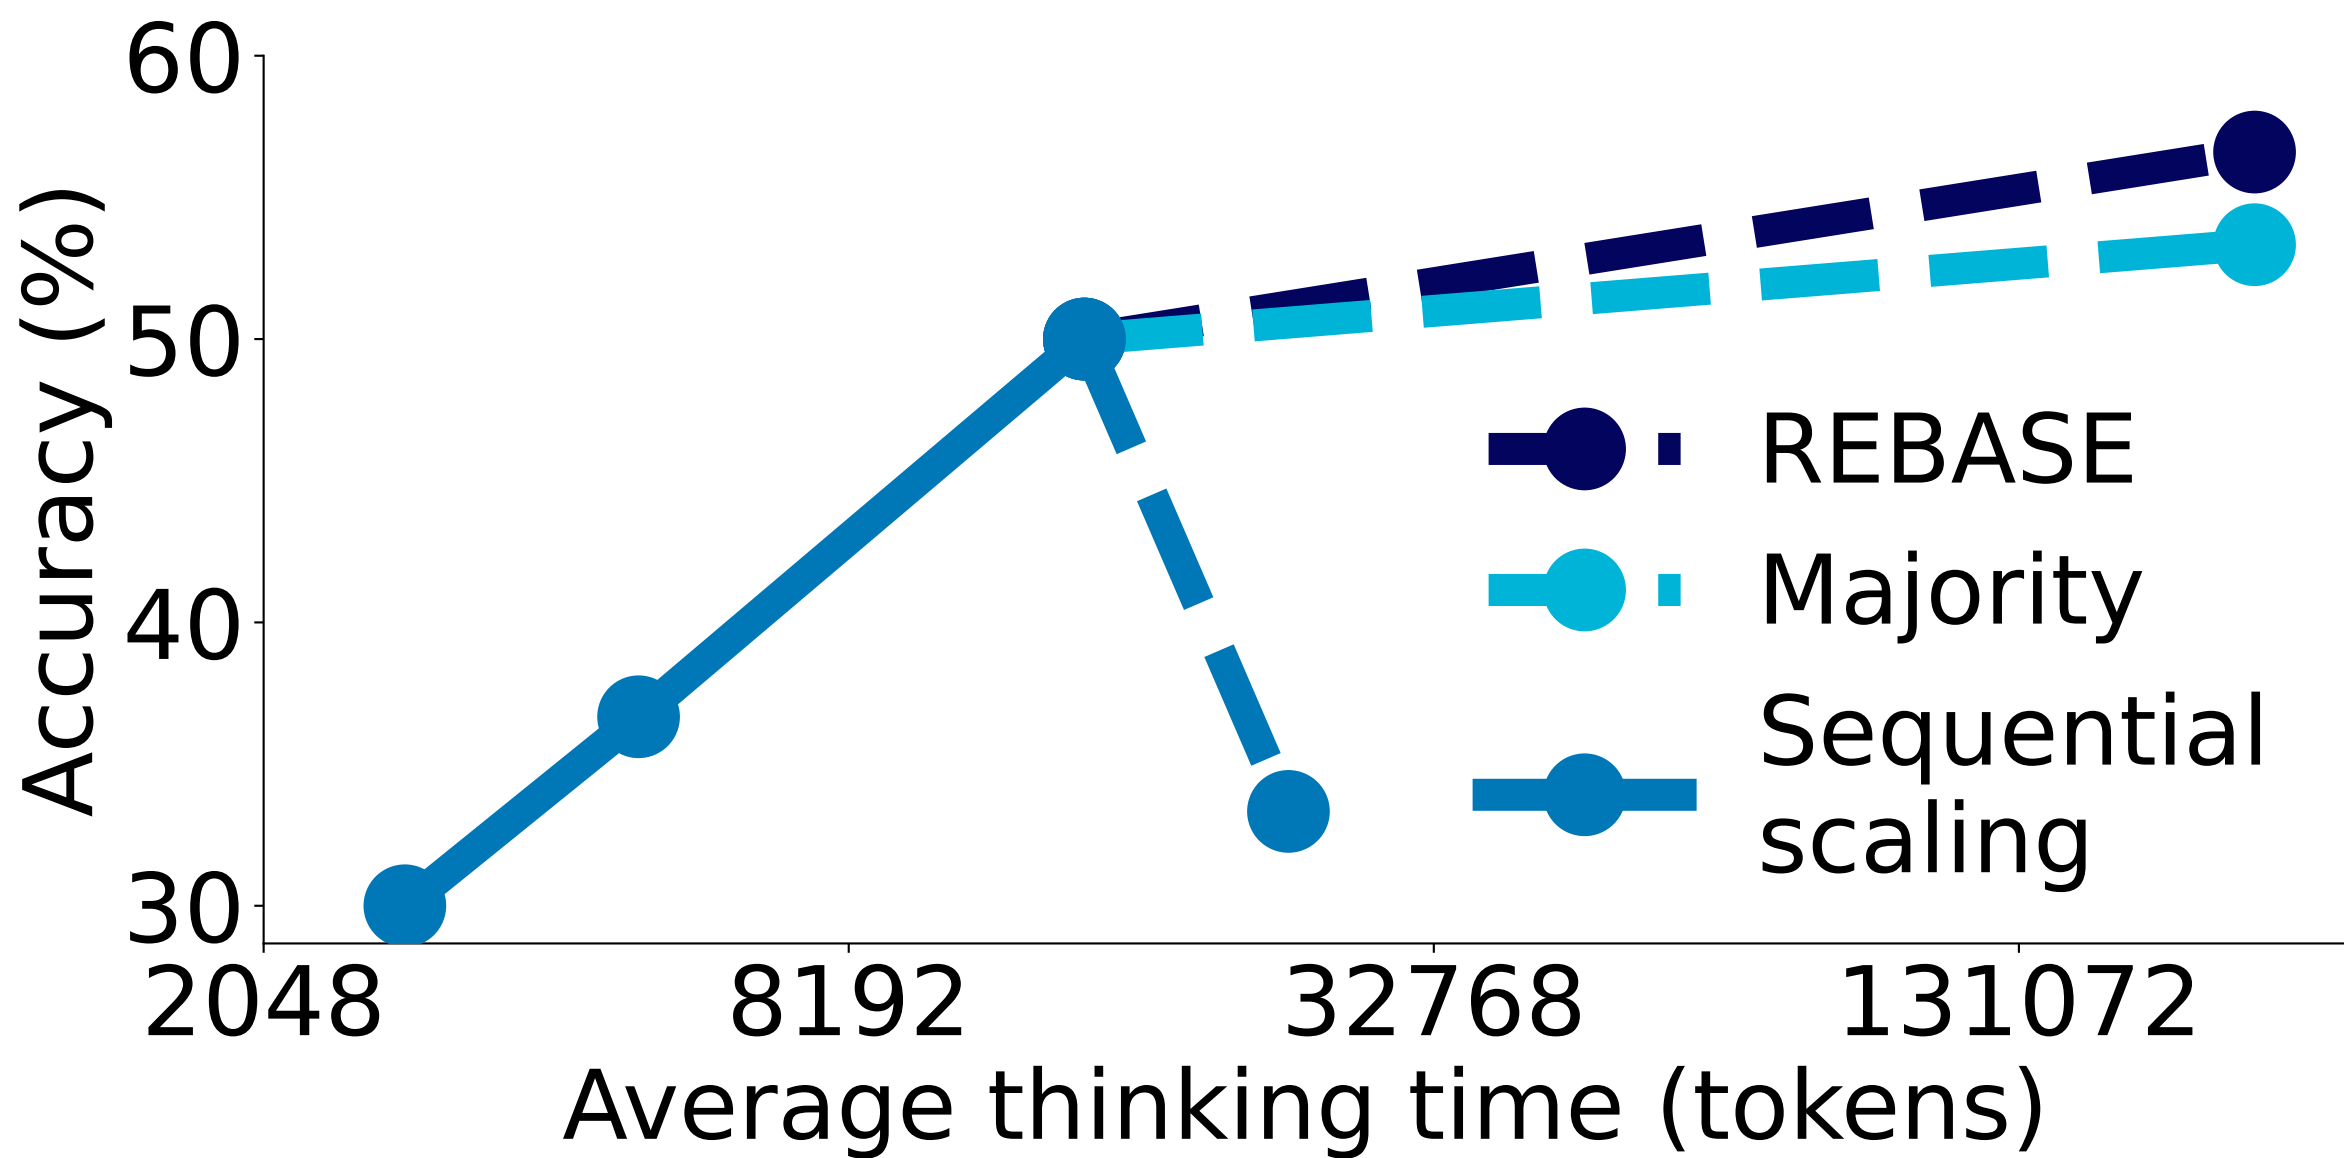

Supplement: supplementary_material [file parallel_stretched.pdf › code/tools/s1/visuals/parallel_stretched.pdf]

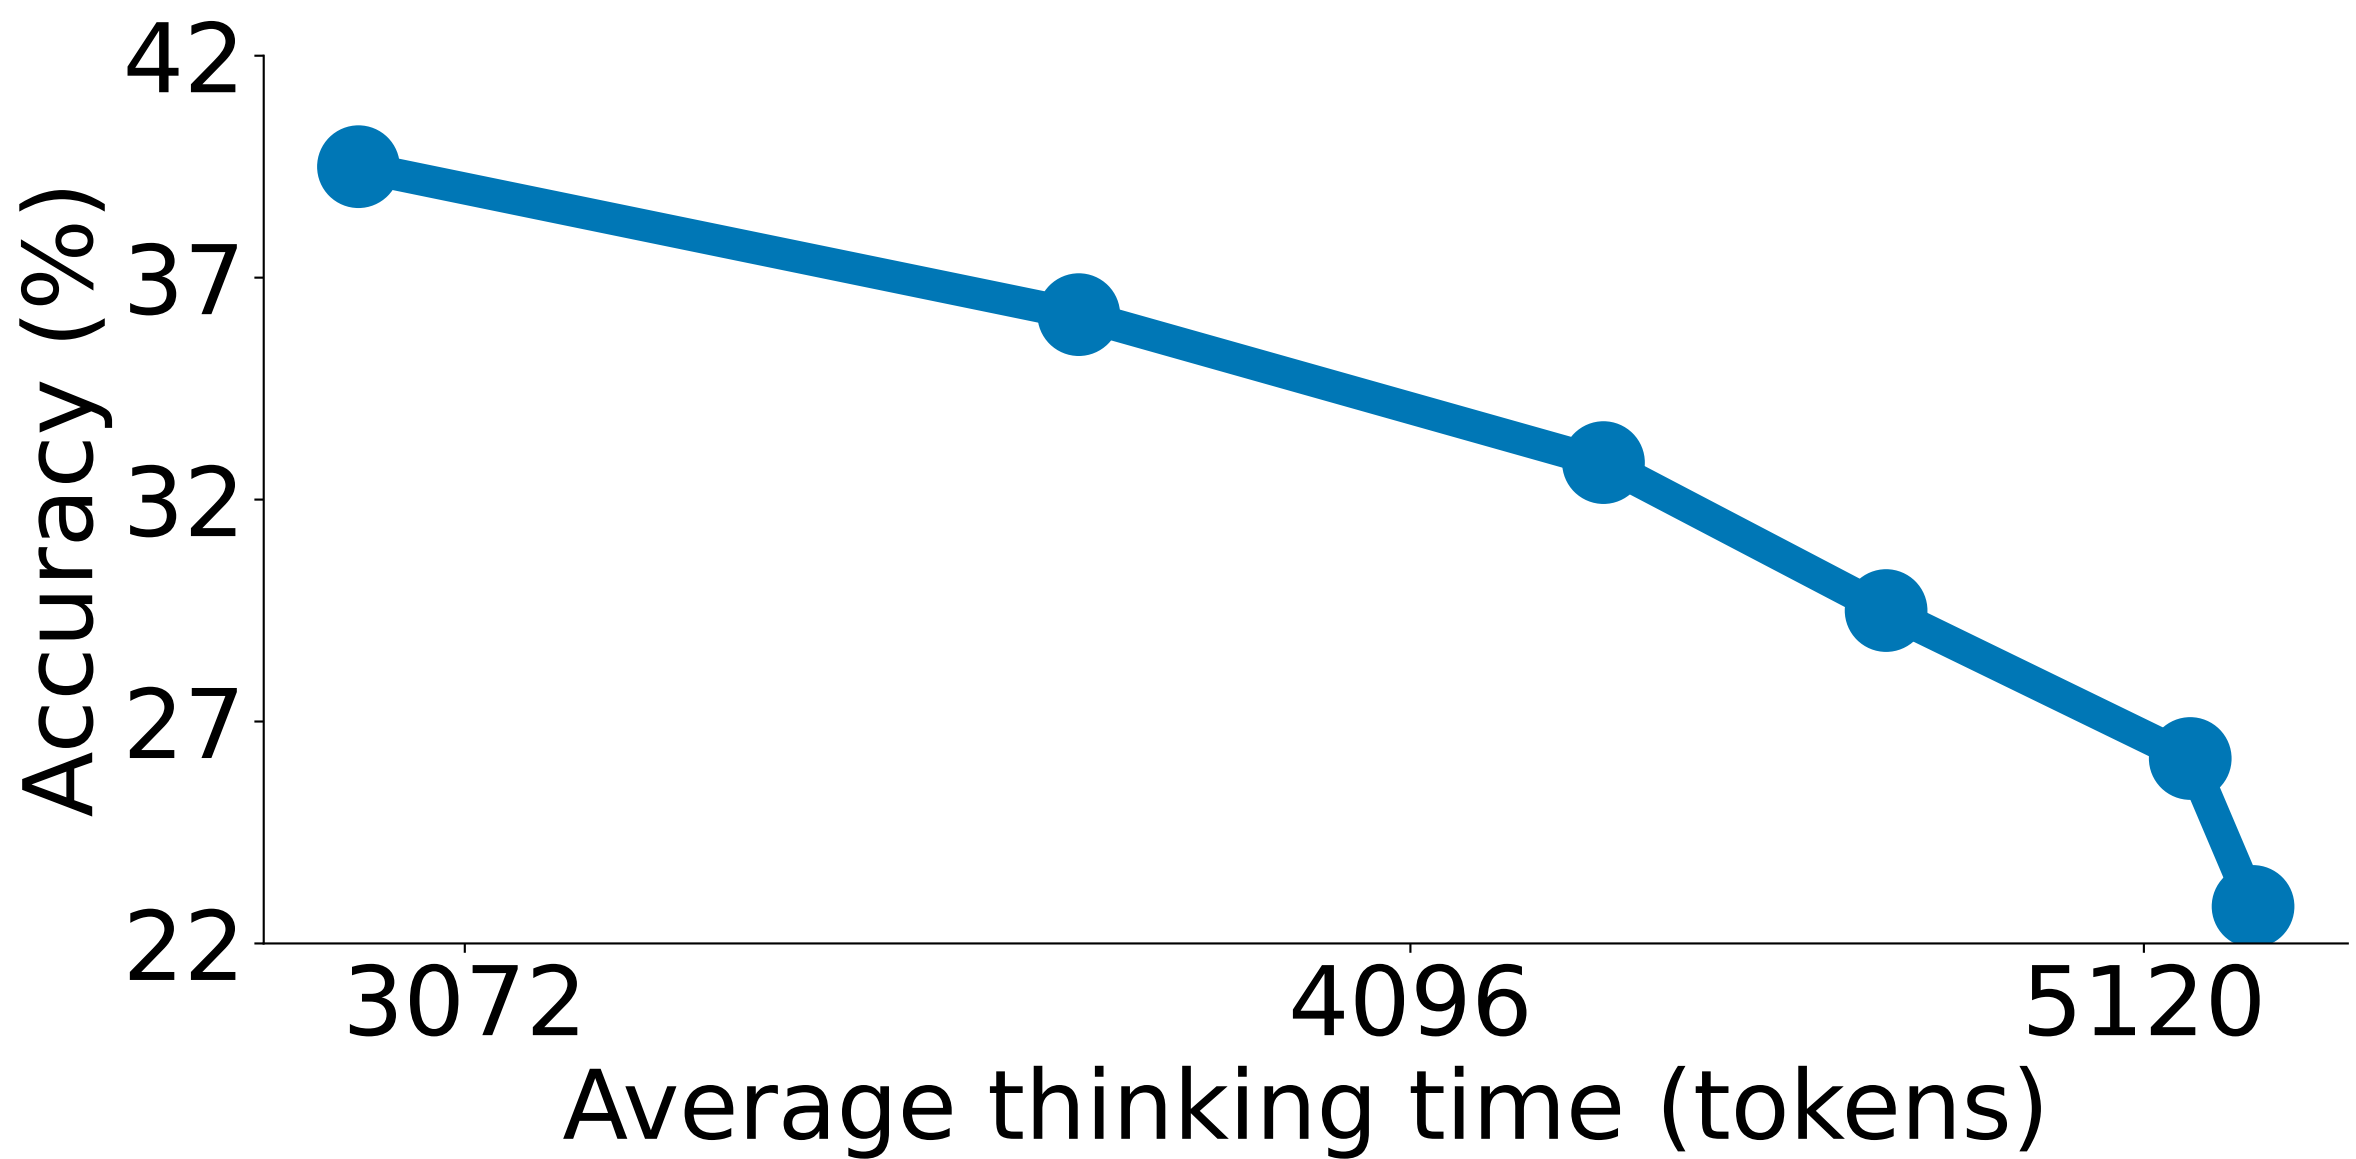

Supplement: supplementary_material [file rejection_stretched.pdf › code/tools/s1/visuals/rejection_stretched.pdf]

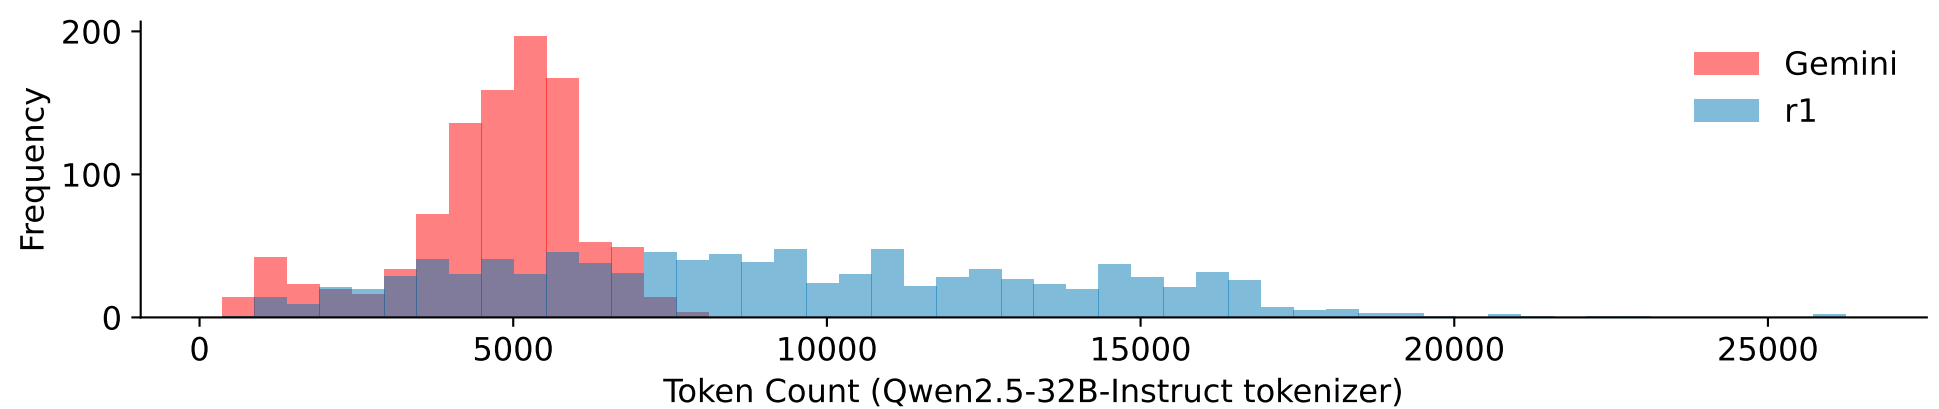

Supplement: supplementary_material [file traces.pdf › code/tools/s1/visuals/s11/traces.pdf]

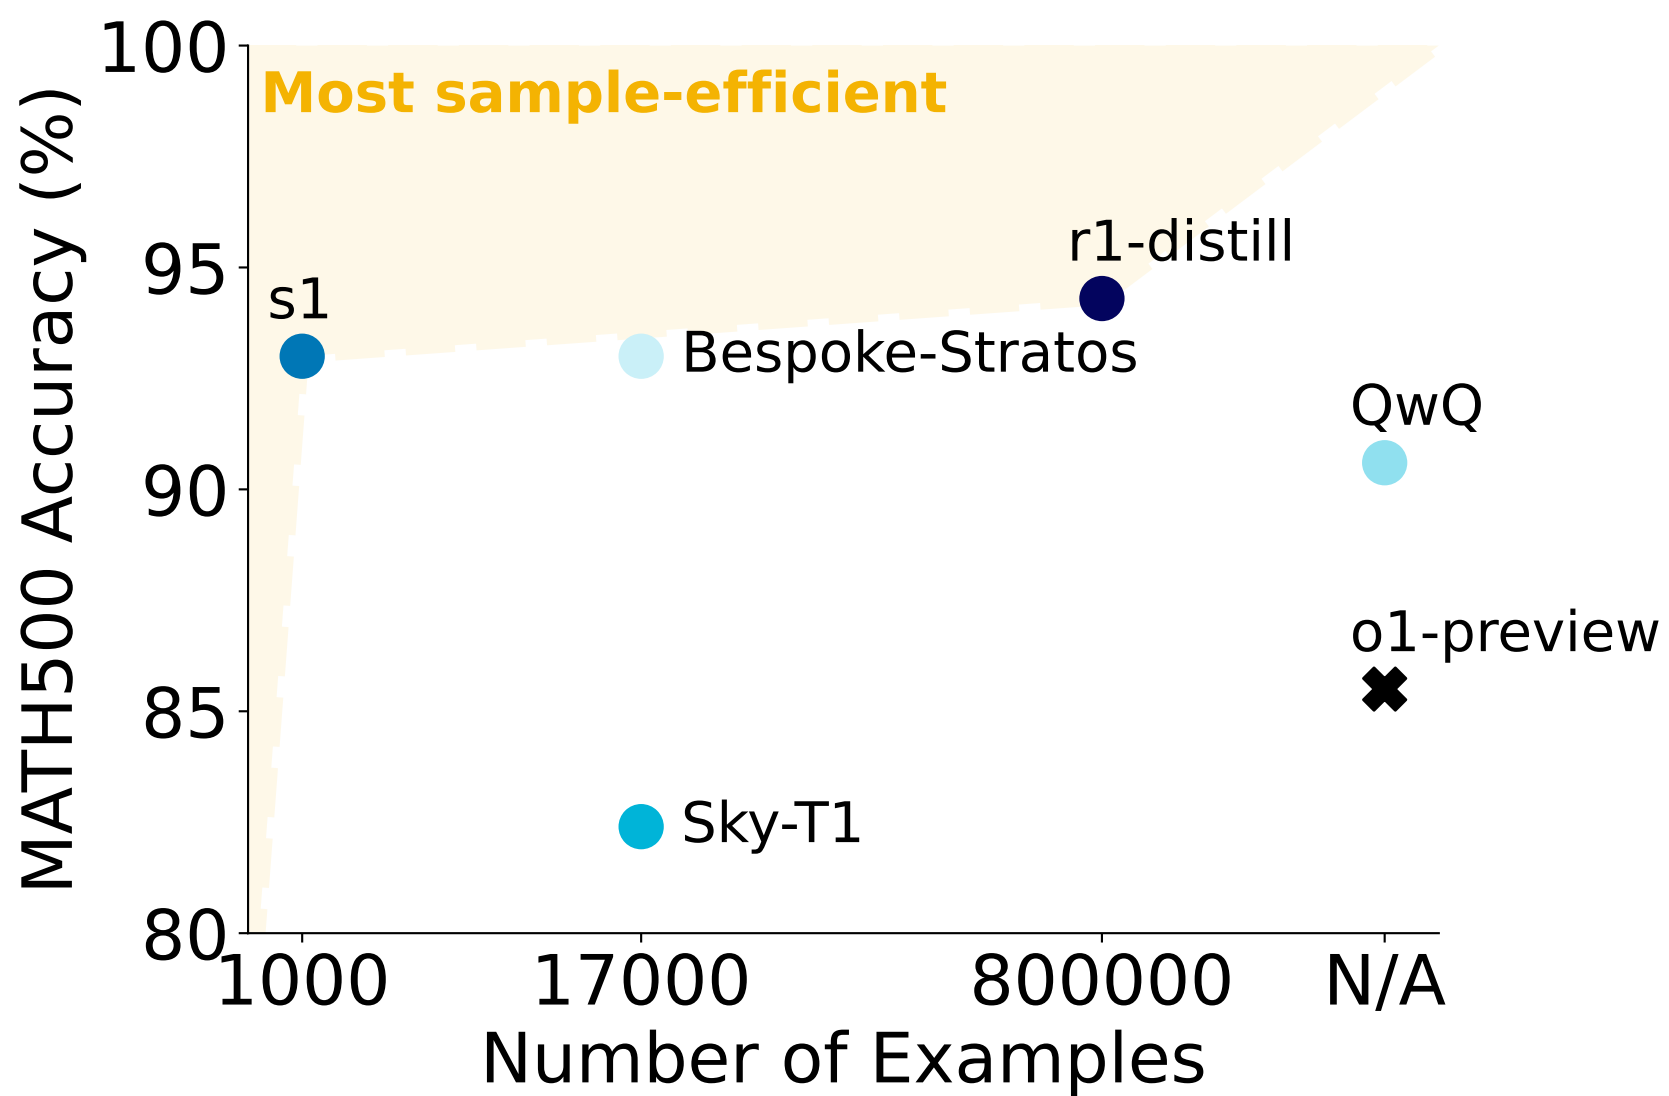

Supplement: supplementary_material [file sample_efficient.pdf › code/tools/s1/visuals/sample_efficient.pdf]
